# Supplementary material for: Quantitative assessment of systolic left ventricular function with speckle-tracking echocardiography in adult patients with repaired aortic coarctation
Source: PubMed Central journal article supplement (PMC4853451; doi:10.1007/s10554-016-0838-8), 2016-01-16
Supplement: 10554_2016_838_MOESM1_ESM.pdf [file 10554_2016_838_MOESM1_ESM.pdf]

**Online Resource 1.** Clinical and echocardiographic characteristics stratified by global longitudinal strain values in tertiles

| <b>Tertiles (GLS, %):</b>            | <b>10.6-16.1%</b>   | <b>16.2-17.9%</b>   | <b>18.0-22.3%</b>    | <b>P-value</b>        |
|--------------------------------------|---------------------|---------------------|----------------------|-----------------------|
|                                      | <b>n=23</b>         | <b>n=22</b>         | <b>n=23</b>          | <b>Kruskal wallis</b> |
| Age (years)                          | 37.1 [21.6-48.4]    | 27.8 [22.6-35.4]    | 30.2 [20.7-37.7]     | 0.394                 |
| Body mass index (kg/m <sup>2</sup> ) | 26.3 [23.5-28.7]    | 24.4 [21.9-28.4]    | 22.8 [21.3-26.3]     | 0.097                 |
| Systolic blood pressure (mmHg)       | 131 [127-155]       | 131 [127-140]       | 135 [119-140]        | 0.583                 |
| Diastolic blood pressure (mmHg)      | 81 [75-90]          | 80 [74-85]          | 74 [67-79]           | 0.047                 |
| QRS duration (ms)                    | 113 [103-138]       | 106 [97-118]        | 112 [104-119]        | 0.32                  |
| LA dimension (PLAX) (mm)             | 36 [32-41]          | 36 [30-42]          | 33 [30-35]           | 0.052                 |
| LV end-diastolic dimension (mm)      | 51 [46-55]          | 49 [47-53]          | 49 [45-53]           | 0.702                 |
| LV end-systolic dimension (mm)       | 31 [28-33]          | 31 [28-35]          | 31 [27-33]           | 0.812                 |
| Interventricular septum (mm)         | 10 [9-11]           | 9 [8-11]            | 9 [8-10]             | 0.018                 |
| LV posterior wall (mm)               | 10 [9-10]           | 9 [8-10]            | 8 [7-9]              | 0.023                 |
| LV mass calculated (g)               | 181.1 [146.9-214.2] | 160.0 [138.3-210.7] | 149.45 [120.2-175.0] | 0.127                 |
| LV EF Simpson's (%)                  | 54 [52-57]          | 56 [54-61]          | 61 [53-66]           | 0.032                 |
| LV deceleration time (ms)            | 185 [160-218]       | 191 [159-251]       | 201 [175-241]        | 0.784                 |
| LV E-top (m/sec)                     | 0.87 [0.73-1.17]    | 1.00 [0.86-1.20]    | 1.10 [0.90-1.16]     | 0.092                 |
| LV E/A-ratio                         | 1.33 [1.09-1.66]    | 1.49 [1.27-1.99]    | 1.58 [1.26-2.25]     | 0.161                 |
| LV E' (cm/sec)                       | 8.11 [6.68-9.49]    | 9.80 [8.34-12.60]   | 8.89 [7.68-11.43]    | 0.035                 |
| NT-proBNP                            | 9.4 [2.7-21.1]      | 7.2 [5.2-13.9]      | 5.5 [2.6-10.3]       | 0.475                 |

Data are presented as median [1<sup>st</sup> quartile-3<sup>rd</sup> quartile].

E = peak mitral inflow velocity at early diastole; E' = early diastolic annular myocardial velocity; EF = ejection fraction; GLS = global longitudinal strain; LA = left atrium; LV = left ventricle; NT-proBNP = N-terminal pro-Brain Natriuretic Peptide; PLAX = parasternal long-axis view
